# Supplementary material for: Nintedanib enhances the efficacy of PD-L1 blockade by upregulating MHC-I and PD-L1 expression in tumor cells
Source: PubMed Central journal article supplement (PMC8692903; doi:10.7150/thno.65828), 2022-01-01
Supplement: thnov12p0747s1.pdf [file thnov12p0747s1.pdf]

## Supplementary Material

### A individual tumor growth curves (MC38)

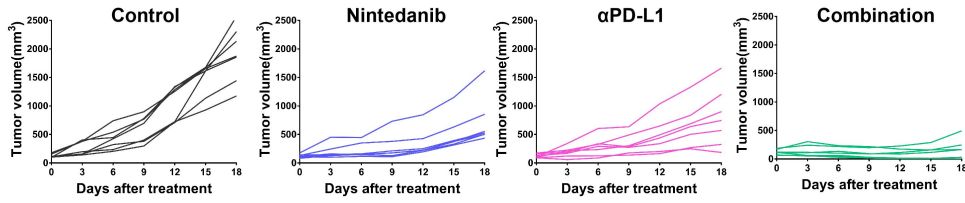

### B individual tumor growth curves (MC38)

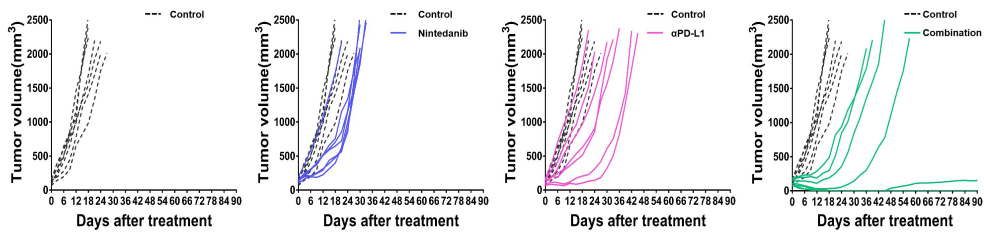

### C individual tumor growth curves (LLC)

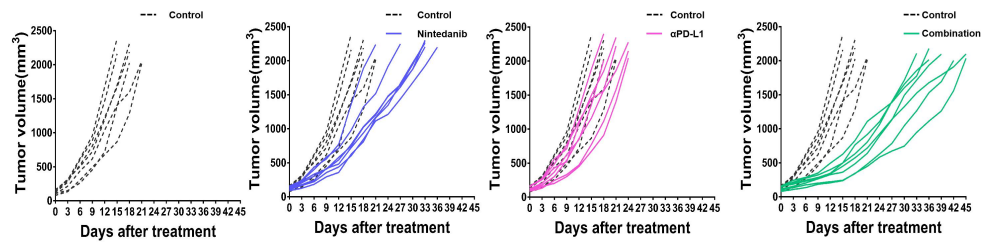

**Figure S1. Individual tumor volume curves of different mouse models.** Individual tumor volume curves for the (A) MC38 tumor inhibition experiment, (B) MC38 and (C) LLC survival experiment.

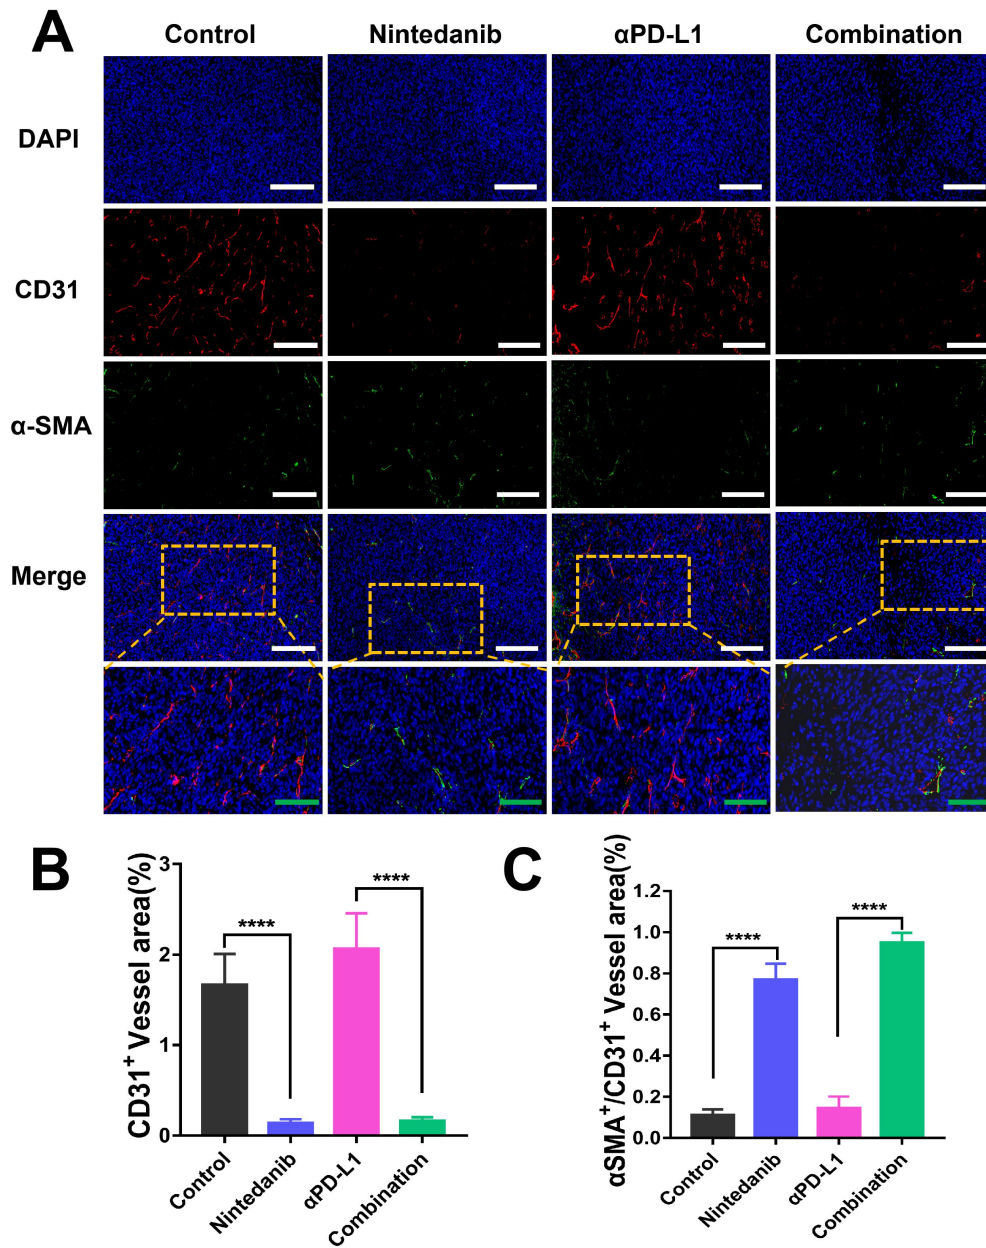

**Figure S2. Immunofluorescence (IF) analysis of vessel normalization of MC38 tumor.** (A) IF images of CD31 and  $\alpha$ -SMA in MC38 tumor tissue. The quantitative analysis of (B) CD31<sup>+</sup> vessel area and (C)  $\alpha$ -SMA<sup>+</sup>/CD31<sup>+</sup> vessel area. The green scale bar is 100  $\mu$ m and the white scale bar is 200  $\mu$ m.

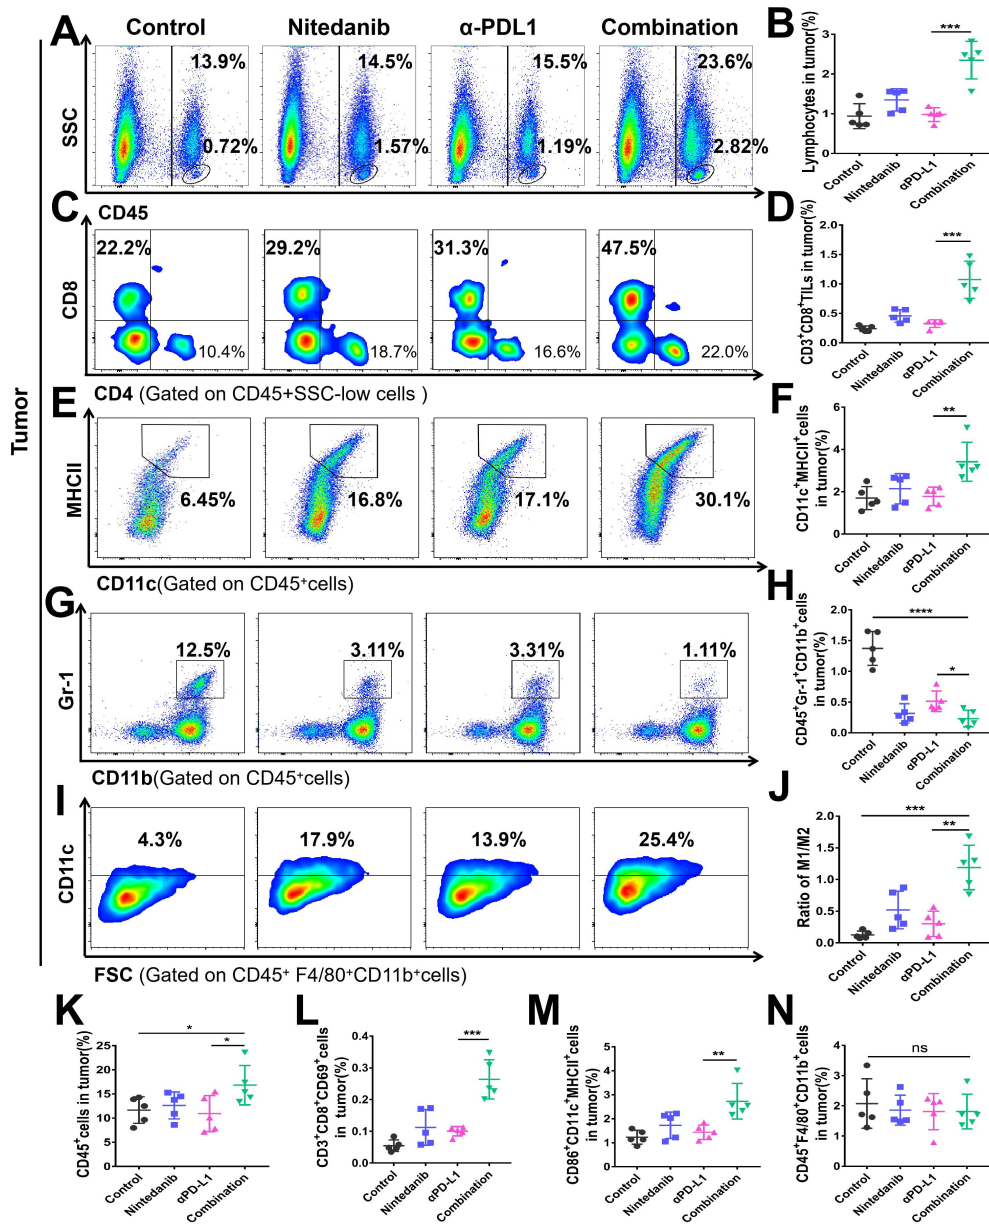

**Figure S3. Flow cytometry analysis of the tumor immune microenvironment (TIME) in LLC tumor tissue.** Representative images of flow cytometry of (A) lymphocytes, (C) CD8<sup>+</sup> T cells (gated on CD45<sup>+</sup> cells + SSC-low cells), (E) CD11c<sup>+</sup>MHCII<sup>+</sup> cells (gated on CD45<sup>+</sup> cells), (G) Gr-1<sup>+</sup>CD11b<sup>+</sup> cells (gated on CD45<sup>+</sup> cells), and (I) CD11c<sup>+</sup> cells (gated on CD45<sup>+</sup>F4/80<sup>+</sup>CD11b<sup>+</sup> cells). Quantitative analysis of the proportion of (B) lymphocytes, (D) CD3<sup>+</sup>CD8<sup>+</sup> TILs, (F) CD11c<sup>+</sup>MHCII<sup>+</sup> cells, (H) CD45<sup>+</sup> Gr-1<sup>+</sup> CD11b<sup>+</sup> cells, (J)M1/M2, (K) CD45<sup>+</sup> cells, (L) CD3<sup>+</sup>CD8<sup>+</sup>CD69<sup>+</sup> cells, (M) CD86<sup>+</sup>CD11c<sup>+</sup>MHCII<sup>+</sup> cells, and (N) CD45<sup>+</sup>F4/80<sup>+</sup>CD11b<sup>+</sup> cells in the tumor.

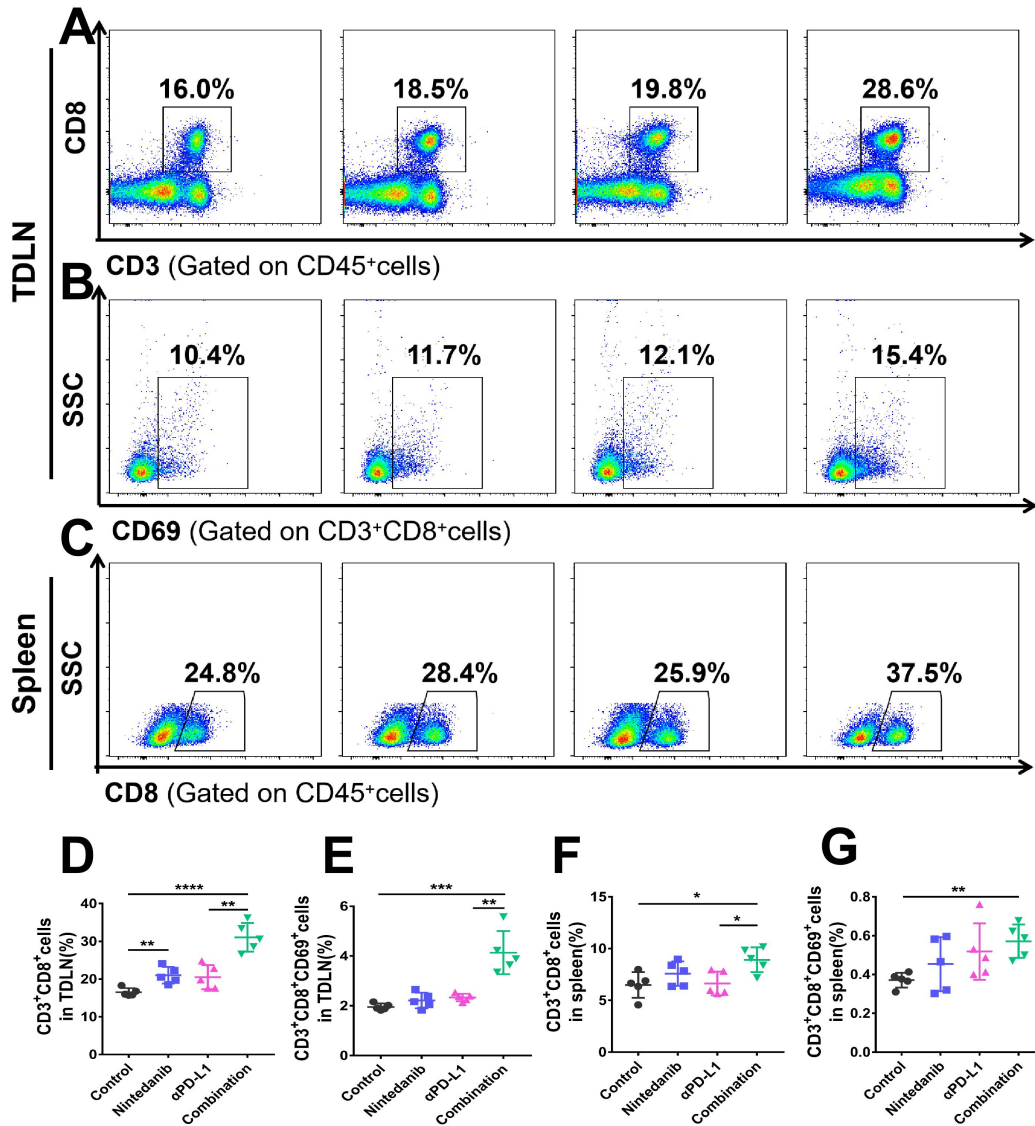

**Figure S4. Flow cytometry analysis of the immune microenvironment in LLC model TDLN and spleen.** Representative images of flow cytometry of (A) CD3<sup>+</sup>CD8<sup>+</sup> T cells (gated on CD45<sup>+</sup> cells) and (B) CD69<sup>+</sup> T cells (gated on CD3<sup>+</sup>CD8<sup>+</sup> cells) in the TDLN, and (C) CD8<sup>+</sup> T cells (gated on CD45<sup>+</sup> cells) in the spleen. Quantitative analysis of the proportion of (D) CD3<sup>+</sup>CD8<sup>+</sup> cells and (E) CD3<sup>+</sup>CD8<sup>+</sup>CD69<sup>+</sup> cells in the TDLN, and (F) CD3<sup>+</sup>CD8<sup>+</sup> cells and (G) CD3<sup>+</sup>CD8<sup>+</sup>CD69<sup>+</sup> cells in the spleen.

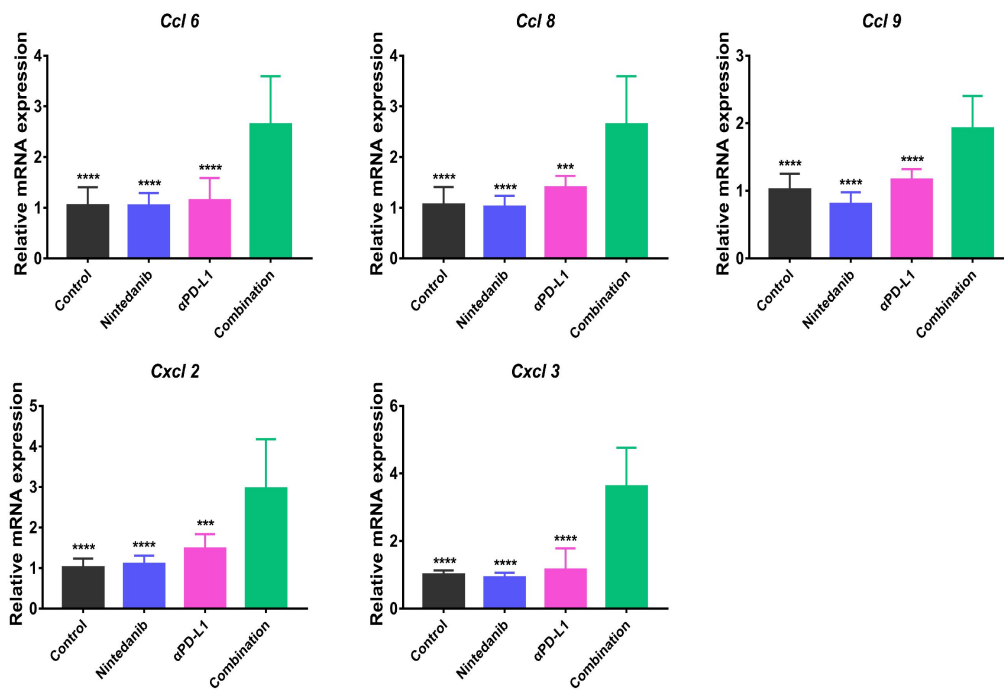

**Figure S5. Real-time PCR (RT-PCR) validation of selected genes identified by RNA-seq.**

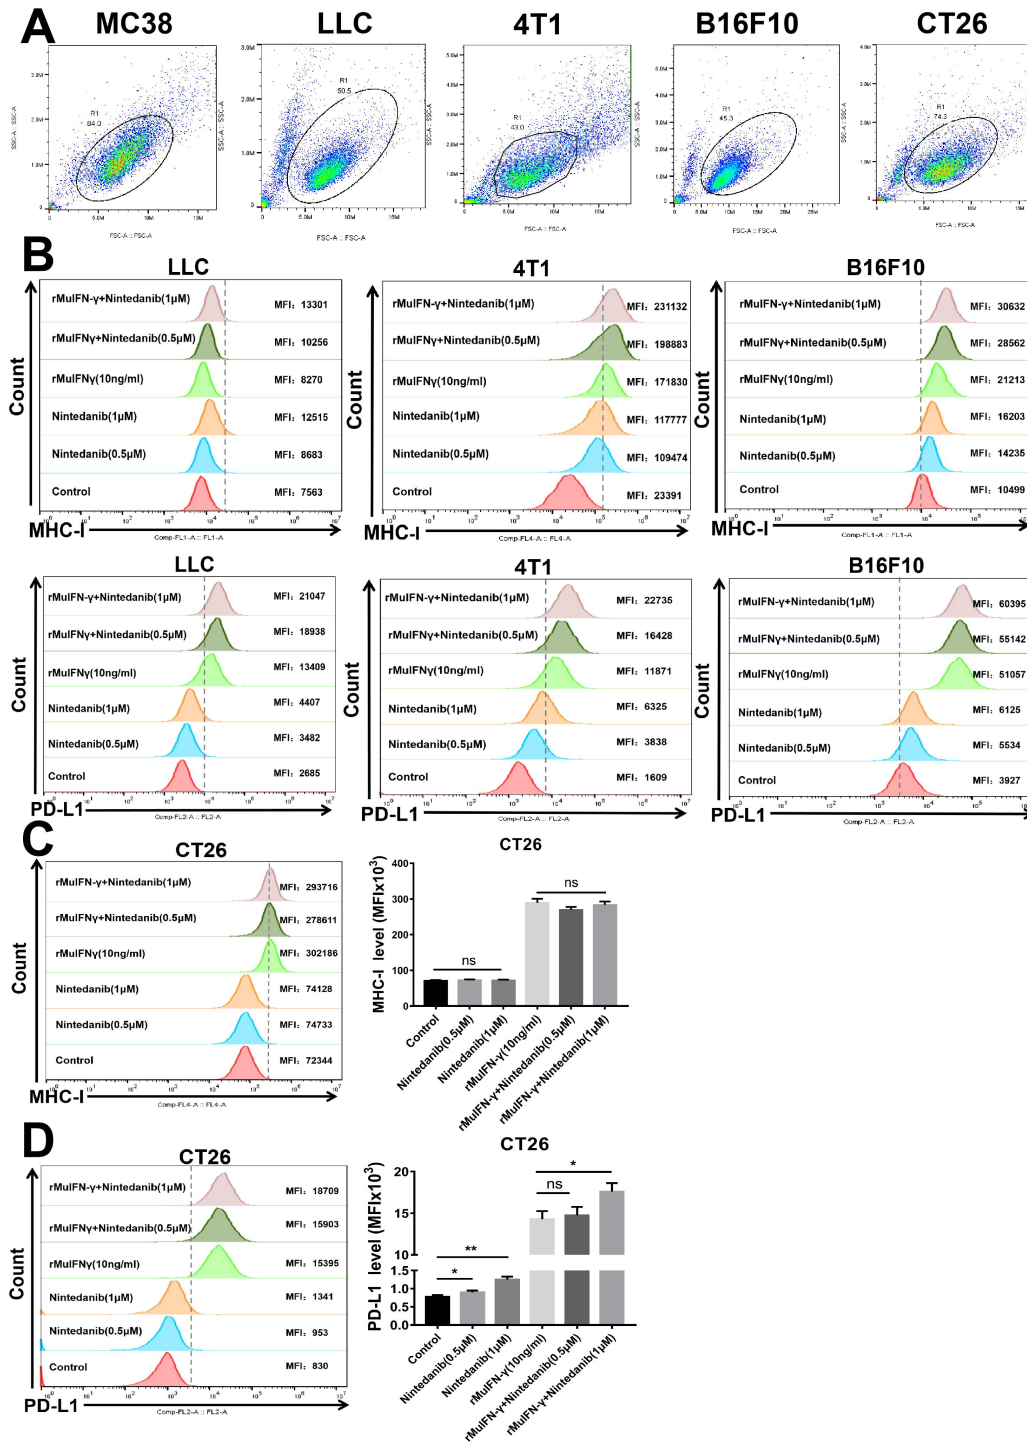

**Figure S6. Detection of MHC-I and PD-L1 expression in a variety of tumor cell lines. (A)** Schematic diagrams of gating on tumor cells. **(B)** Representative images of MHC-I and PD-L1 levels in different tumor cells. Representative images and quantification of **(C)** MHC-I and **(D)** PD-L1 levels in CT26 cells.

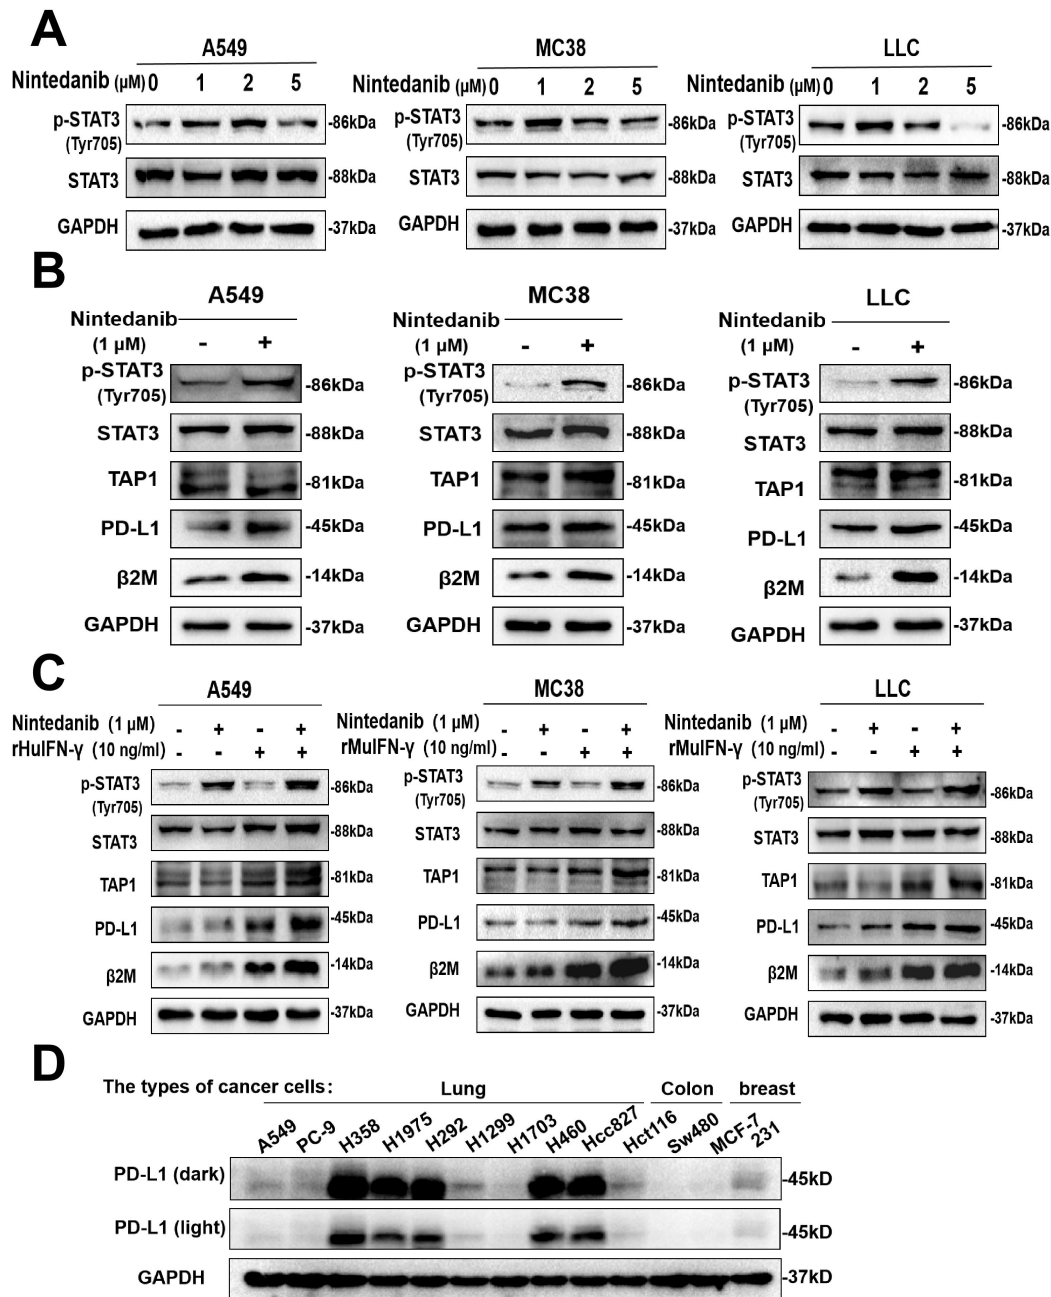

**Figure S7. The effect of nintedanib on different tumor cells (A549, MC38 and LLC).** (A) Western blotting assays of p-STAT3/STAT3 under different concentrations of nintedanib treatment for 24 h. Western blotting assays of p-STAT3/STAT3, TAP1, PD-L1 and  $\beta$ 2M after (B) 1  $\mu\text{M}$  nintedanib and (C) combination treatment for 24 h. (D) The basal levels of PD-L1 in different tumor cells.

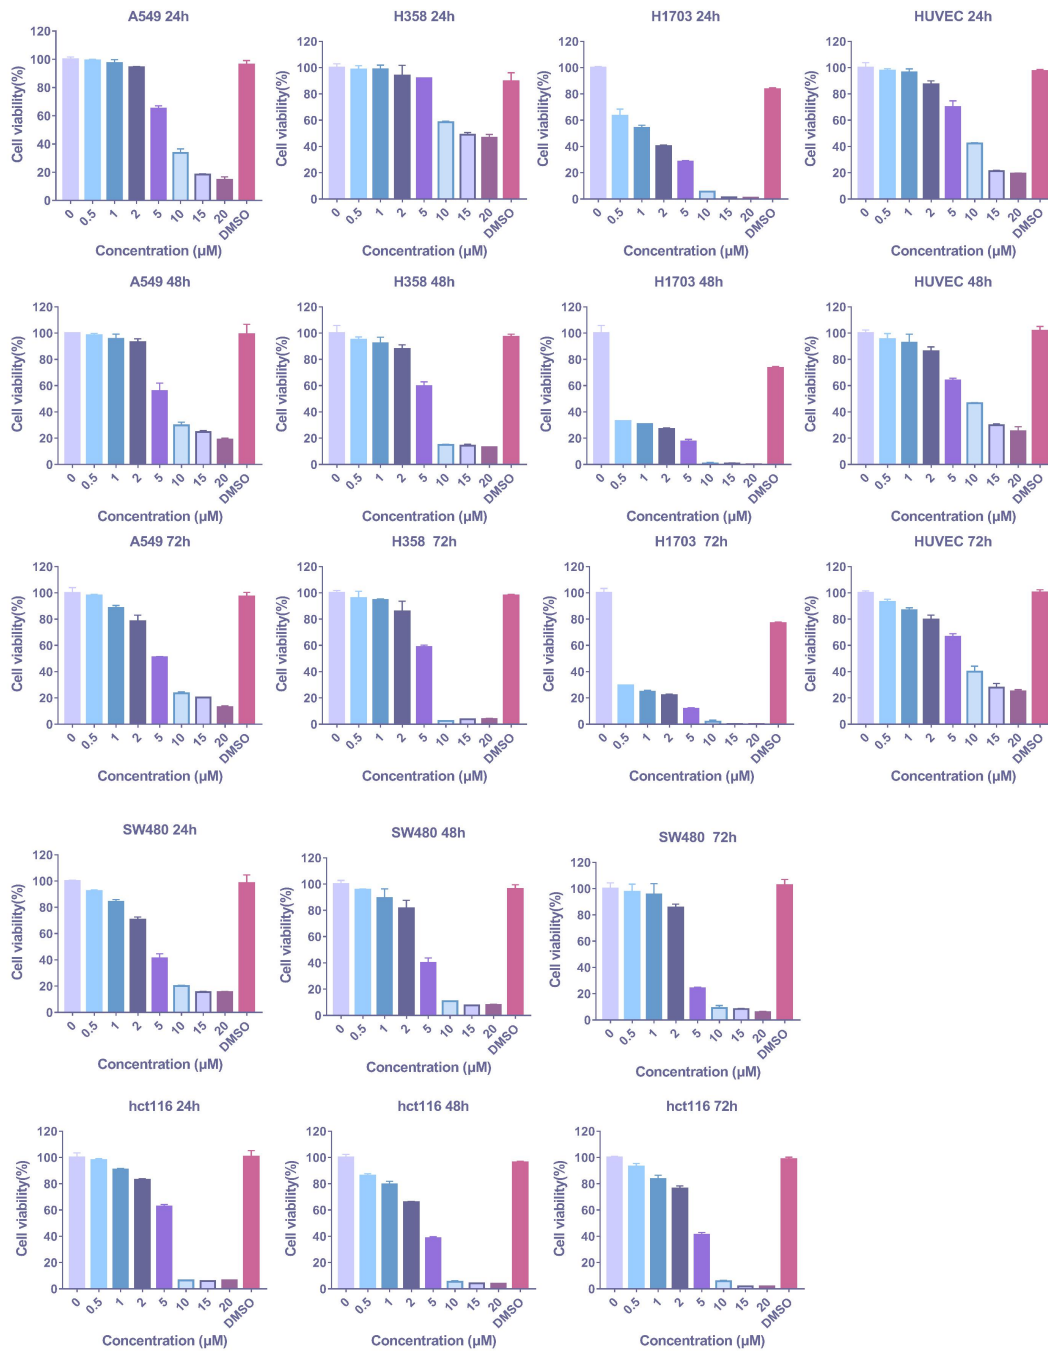

**Figure S8. Various human tumor cells and HUVEC treated with different concentrations of nintedanib for 24, 48, or 72 h and detection of cytotoxicity using CCK-8 assays.**



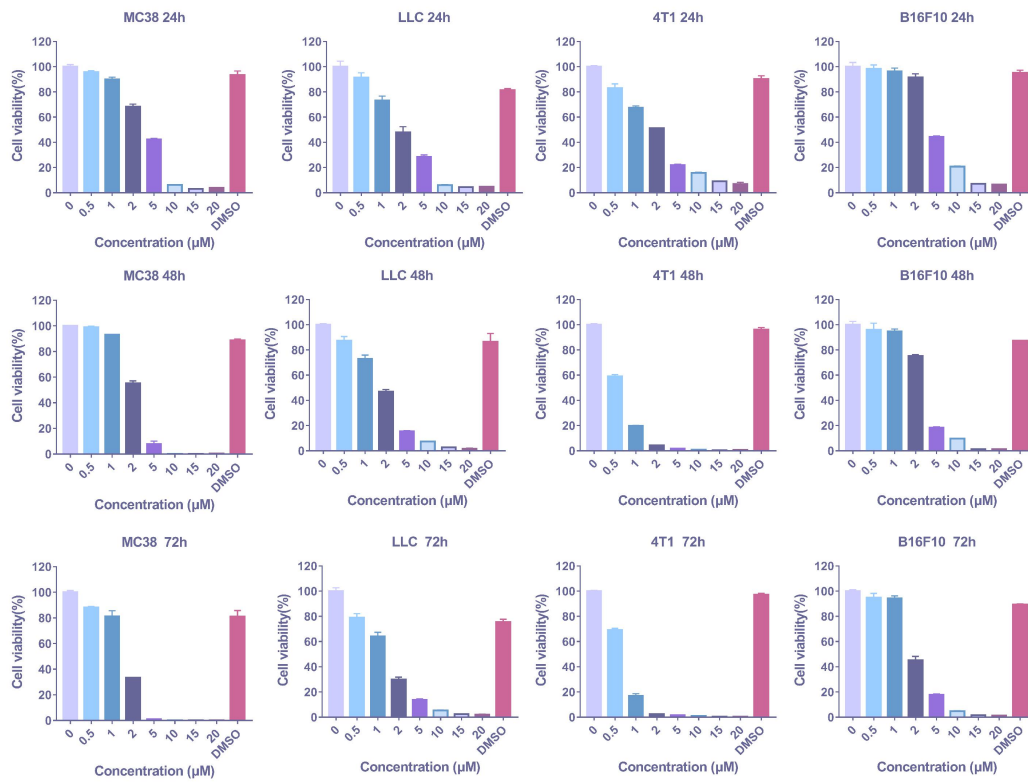

**Figure S9. Various mouse tumor cells treated with different concentrations of nintedanib for 24, 48, or 72 h and detection of cytotoxicity using CCK-8.**

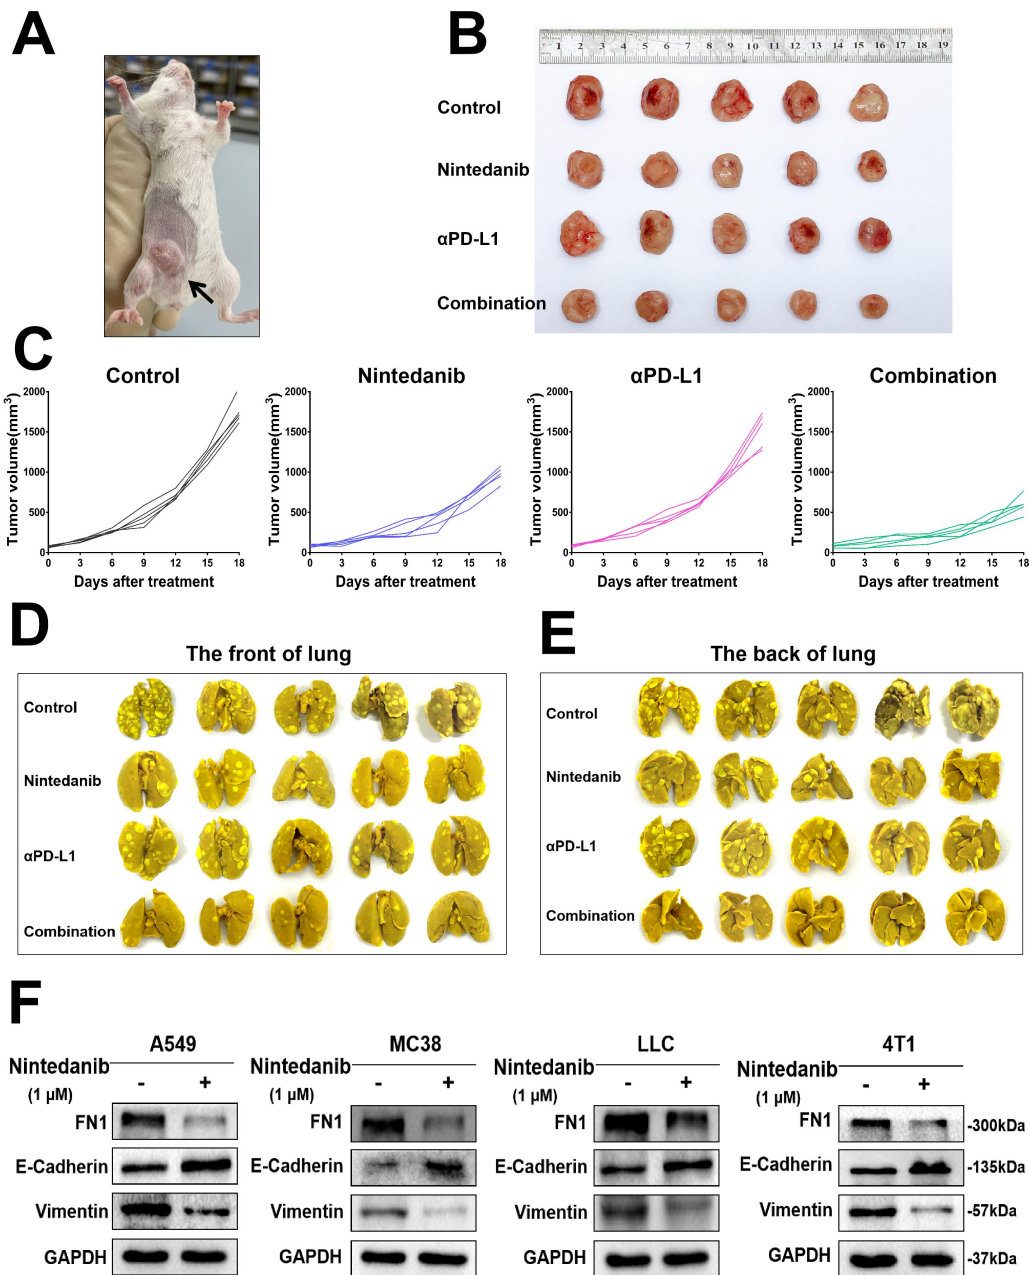

**Figure S10. Tumor growth and metastasis in the lungs of the 4T1 model.** (A) Schematic diagram of the 4T1 tumor-bearing model (black arrow is 4T1 tumor). (B) Images and (C) individual tumor volume curves of 4T1 tumors. The (D) front and (E) back view of individual lung tissues. (F) Western blotting assays of epithelial-mesenchymal transition (EMT) related indicators in different tumor cells after nintedanib treatment *in vitro* for 24 h.

**Table S1. Union list of the top 100 immune-related GO terms for the DEGs from the combination vs. control groups,  $\alpha$ PD-L1 vs. control groups, and nintedanib vs. control groups.**

| GOID       | Description                                                                                                               | GeneRatio | padj     |
|------------|---------------------------------------------------------------------------------------------------------------------------|-----------|----------|
| GO:0050778 | positive regulation of immune response                                                                                    | 66/683    | 2.40E-14 |
| GO:0001819 | positive regulation of cytokine production                                                                                | 56/683    | 9.28E-14 |
| GO:0034341 | response to interferon-gamma                                                                                              | 31/683    | 1.03E-13 |
| GO:0002474 | antigen processing and presentation of peptide antigen via MHC class I                                                    | 18/683    | 3.83E-13 |
| GO:0002697 | regulation of immune effector process                                                                                     | 50/683    | 7.04E-13 |
| GO:0071346 | cellular response to interferon-gamma                                                                                     | 27/683    | 1.15E-12 |
| GO:0097530 | granulocyte migration                                                                                                     | 29/683    | 1.49E-12 |
| GO:1990266 | neutrophil migration                                                                                                      | 26/683    | 2.54E-12 |
| GO:0019882 | antigen processing and presentation                                                                                       | 25/683    | 2.76E-12 |
| GO:0048002 | antigen processing and presentation of peptide antigen                                                                    | 20/683    | 5.90E-12 |
| GO:0071621 | granulocyte chemotaxis                                                                                                    | 26/683    | 6.33E-12 |
| GO:0030593 | neutrophil chemotaxis                                                                                                     | 23/683    | 1.33E-11 |
| GO:0030595 | leukocyte chemotaxis                                                                                                      | 34/683    | 3.30E-11 |
| GO:0050900 | leukocyte migration                                                                                                       | 43/683    | 4.44E-11 |
| GO:0002694 | regulation of leukocyte activation                                                                                        | 54/683    | 3.97E-10 |
| GO:1903555 | regulation of tumor necrosis factor superfamily cytokine production                                                       | 27/683    | 5.31E-10 |
| GO:0002250 | adaptive immune response                                                                                                  | 45/683    | 6.55E-10 |
| GO:0071706 | tumor necrosis factor superfamily cytokine production                                                                     | 27/683    | 8.68E-10 |
| GO:0032635 | interleukin-6 production                                                                                                  | 26/683    | 9.69E-10 |
| GO:0002703 | regulation of leukocyte mediated immunity                                                                                 | 32/683    | 1.07E-09 |
| GO:0002460 | adaptive immune response based on somatic recombination of immune receptors built from immunoglobulin superfamily domains | 36/683    | 1.09E-09 |
| GO:0002443 | leukocyte mediated immunity                                                                                               | 41/683    | 1.29E-09 |
| GO:1903557 | positive regulation of tumor necrosis factor superfamily cytokine production                                              | 21/683    | 1.34E-09 |
| GO:0032675 | regulation of interleukin-6 production                                                                                    | 25/683    | 1.63E-09 |
| GO:0002483 | antigen processing and presentation of endogenous peptide antigen                                                         | 9/683     | 2.02E-09 |
| GO:0045088 | regulation of innate immune response                                                                                      | 35/683    | 4.57E-09 |
| GO:0032760 | positive regulation of tumor necrosis factor production                                                                   | 20/683    | 7.49E-09 |
| GO:0032680 | regulation of tumor necrosis factor production                                                                            | 25/683    | 9.15E-09 |
| GO:0032640 | tumor necrosis factor production                                                                                          | 25/683    | 1.23E-08 |
| GO:0002449 | lymphocyte mediated immunity                                                                                              | 33/683    | 1.71E-08 |
| GO:0019883 | antigen processing and presentation of endogenous antigen                                                                 | 9/683     | 2.00E-08 |
| GO:0019221 | cytokine-mediated signaling pathway                                                                                       | 41/683    | 2.02E-08 |
| GO:0035456 | response to interferon-beta                                                                                               | 15/683    | 3.98E-08 |
| GO:0002696 | positive regulation of leukocyte activation                                                                               | 36/683    | 1.07E-07 |

|            |                                                                                                                                         |        |          |
|------------|-----------------------------------------------------------------------------------------------------------------------------------------|--------|----------|
| GO:0002253 | activation of immune response                                                                                                           | 39/683 | 2.05E-07 |
| GO:0035458 | cellular response to interferon-beta                                                                                                    | 13/683 | 2.17E-07 |
| GO:0042110 | T cell activation                                                                                                                       | 46/683 | 3.58E-07 |
| GO:0051249 | regulation of lymphocyte activation                                                                                                     | 42/683 | 3.64E-07 |
| GO:0070661 | leukocyte proliferation                                                                                                                 | 35/683 | 4.03E-07 |
| GO:0002706 | regulation of lymphocyte mediated immunity                                                                                              | 23/683 | 8.24E-07 |
| GO:0070098 | chemokine-mediated signaling pathway                                                                                                    | 13/683 | 1.29E-06 |
| GO:0002699 | positive regulation of immune effector process                                                                                          | 27/683 | 1.40E-06 |
| GO:0007159 | leukocyte cell-cell adhesion                                                                                                            | 34/683 | 1.81E-06 |
| GO:0002822 | regulation of adaptive immune response based on somatic recombination of immune receptors built from immunoglobulin superfamily domains | 22/683 | 2.01E-06 |
| GO:0002819 | regulation of adaptive immune response                                                                                                  | 23/683 | 2.07E-06 |
| GO:0051251 | positive regulation of lymphocyte activation                                                                                            | 30/683 | 2.43E-06 |
| GO:0046651 | lymphocyte proliferation                                                                                                                | 32/683 | 3.70E-06 |
| GO:0001909 | leukocyte mediated cytotoxicity                                                                                                         | 18/683 | 4.13E-06 |
| GO:0002521 | leukocyte differentiation                                                                                                               | 47/683 | 4.28E-06 |
| GO:0070665 | positive regulation of leukocyte proliferation                                                                                          | 21/683 | 6.19E-06 |
| GO:0001910 | regulation of leukocyte mediated cytotoxicity                                                                                           | 15/683 | 6.65E-06 |
| GO:0045089 | positive regulation of innate immune response                                                                                           | 26/683 | 6.67E-06 |
| GO:1902107 | positive regulation of leukocyte differentiation                                                                                        | 22/683 | 7.87E-06 |
| GO:0002764 | immune response-regulating signaling pathway                                                                                            | 32/683 | 1.24E-05 |
| GO:0032946 | positive regulation of mononuclear cell proliferation                                                                                   | 20/683 | 1.46E-05 |
| GO:0002685 | regulation of leukocyte migration                                                                                                       | 24/683 | 1.46E-05 |
| GO:0002705 | positive regulation of leukocyte mediated immunity                                                                                      | 19/683 | 1.55E-05 |
| GO:0002688 | regulation of leukocyte chemotaxis                                                                                                      | 18/683 | 1.59E-05 |
| GO:0050900 | leukocyte migration                                                                                                                     | 19/357 | 5.71E-03 |
| GO:0060326 | cell chemotaxis                                                                                                                         | 15/357 | 3.87E-02 |
| GO:0071346 | cellular response to interferon-gamma                                                                                                   | 9/357  | 4.07E-02 |
| GO:0030593 | neutrophil chemotaxis                                                                                                                   | 11/71  | 3.96E-11 |
| GO:1990266 | neutrophil migration                                                                                                                    | 11/71  | 1.67E-10 |
| GO:0071621 | granulocyte chemotaxis                                                                                                                  | 11/71  | 1.78E-10 |
| GO:0030595 | leukocyte chemotaxis                                                                                                                    | 13/71  | 2.94E-10 |
| GO:0060326 | cell chemotaxis                                                                                                                         | 14/71  | 5.34E-10 |
| GO:0097530 | granulocyte migration                                                                                                                   | 11/71  | 5.34E-10 |
| GO:0006935 | chemotaxis                                                                                                                              | 17/71  | 4.00E-09 |
| GO:0050900 | leukocyte migration                                                                                                                     | 13/71  | 3.65E-08 |
| GO:0002250 | adaptive immune response                                                                                                                | 13/71  | 2.37E-07 |
| GO:0002460 | adaptive immune response based on somatic recombination of immune receptors built from immunoglobulin superfamily domains               | 10/71  | 5.99E-06 |
| GO:0090022 | regulation of neutrophil chemotaxis                                                                                                     | 5/71   | 3.41E-05 |
| GO:0002694 | regulation of leukocyte activation                                                                                                      | 12/71  | 4.59E-05 |
| GO:0006909 | phagocytosis                                                                                                                            | 8/71   | 6.06E-05 |
| GO:0050778 | positive regulation of immune response                                                                                                  | 12/71  | 8.60E-05 |

|            |                                                                              |       |          |
|------------|------------------------------------------------------------------------------|-------|----------|
| GO:1902622 | regulation of neutrophil migration                                           | 5/71  | 8.60E-05 |
| GO:0002757 | immune response-activating signal transduction                               | 9/71  | 1.68E-04 |
| GO:0071622 | regulation of granulocyte chemotaxis                                         | 5/71  | 1.68E-04 |
| GO:0002696 | positive regulation of leukocyte activation                                  | 9/71  | 2.00E-04 |
| GO:0050718 | positive regulation of interleukin-1 beta secretion                          | 4/71  | 2.08E-04 |
| GO:0002764 | immune response-regulating signaling pathway                                 | 9/71  | 2.13E-04 |
| GO:0050716 | positive regulation of interleukin-1 secretion                               | 4/71  | 2.21E-04 |
| GO:0050766 | positive regulation of phagocytosis                                          | 5/71  | 2.21E-04 |
| GO:0051249 | regulation of lymphocyte activation                                          | 10/71 | 2.46E-04 |
| GO:0002429 | immune response-activating cell surface receptor signaling pathway           | 7/71  | 2.69E-04 |
| GO:0090023 | positive regulation of neutrophil chemotaxis                                 | 4/71  | 3.07E-04 |
| GO:0002688 | regulation of leukocyte chemotaxis                                           | 6/71  | 3.07E-04 |
| GO:0050706 | regulation of interleukin-1 beta secretion                                   | 4/71  | 3.33E-04 |
| GO:0051251 | positive regulation of lymphocyte activation                                 | 8/71  | 3.41E-04 |
| GO:0002768 | immune response-regulating cell surface receptor signaling pathway           | 7/71  | 3.42E-04 |
| GO:0071624 | positive regulation of granulocyte chemotaxis                                | 4/71  | 3.42E-04 |
| GO:0002253 | activation of immune response                                                | 9/71  | 4.23E-04 |
| GO:0032731 | positive regulation of interleukin-1 beta production                         | 4/71  | 4.23E-04 |
| GO:0002685 | regulation of leukocyte migration                                            | 7/71  | 4.26E-04 |
| GO:0034341 | response to interferon-gamma                                                 | 6/71  | 4.78E-04 |
| GO:0050704 | regulation of interleukin-1 secretion                                        | 4/71  | 4.91E-04 |
| GO:0050702 | interleukin-1 beta secretion                                                 | 4/71  | 5.28E-04 |
| GO:1902624 | positive regulation of neutrophil migration                                  | 4/71  | 5.28E-04 |
| GO:0042110 | T cell activation                                                            | 10/71 | 5.52E-04 |
| GO:0050920 | regulation of chemotaxis                                                     | 7/71  | 5.93E-04 |
| GO:0050921 | positive regulation of chemotaxis                                            | 6/71  | 5.93E-04 |
| GO:0046651 | lymphocyte proliferation                                                     | 8/71  | 5.93E-04 |
| GO:0032732 | positive regulation of interleukin-1 production                              | 4/71  | 5.93E-04 |
| GO:0032680 | regulation of tumor necrosis factor production                               | 6/71  | 5.93E-04 |
| GO:0032943 | mononuclear cell proliferation                                               | 8/71  | 5.93E-04 |
| GO:0032640 | tumor necrosis factor production                                             | 6/71  | 6.13E-04 |
| GO:1903555 | regulation of tumor necrosis factor superfamily cytokine production          | 6/71  | 6.13E-04 |
| GO:0050764 | regulation of phagocytosis                                                   | 5/71  | 6.38E-04 |
| GO:0050871 | positive regulation of B cell activation                                     | 5/71  | 6.38E-04 |
| GO:0071706 | tumor necrosis factor superfamily cytokine production                        | 6/71  | 6.60E-04 |
| GO:0032760 | positive regulation of tumor necrosis factor production                      | 5/71  | 6.96E-04 |
| GO:0070661 | leukocyte proliferation                                                      | 8/71  | 6.97E-04 |
| GO:1903557 | positive regulation of tumor necrosis factor superfamily cytokine production | 5/71  | 7.14E-04 |
| GO:0050701 | interleukin-1 secretion                                                      | 4/71  | 7.33E-04 |
| GO:0002690 | positive regulation of leukocyte chemotaxis                                  | 5/71  | 7.33E-04 |
| GO:0007159 | leukocyte cell-cell adhesion                                                 | 8/71  | 7.40E-04 |
| GO:0030890 | positive regulation of B cell proliferation                                  | 4/71  | 7.76E-04 |
| GO:0001819 | positive regulation of cytokine production                                   | 9/71  | 8.41E-04 |

|            |                                                                                                                       |       |          |
|------------|-----------------------------------------------------------------------------------------------------------------------|-------|----------|
| GO:0002449 | lymphocyte mediated immunity                                                                                          | 7/71  | 1.06E-03 |
| GO:0002521 | leukocyte differentiation                                                                                             | 10/71 | 1.07E-03 |
| GO:0002285 | lymphocyte activation involved in immune response<br>positive regulation of adaptive immune response based on somatic | 6/71  | 1.11E-03 |
| GO:0002824 | recombination<br>of immune receptors built from immunoglobulin superfamily domains                                    | 5/71  | 1.12E-03 |
| GO:0006911 | phagocytosis, engulfment                                                                                              | 4/71  | 1.19E-03 |
| GO:0032651 | regulation of interleukin-1 beta production                                                                           | 4/71  | 1.28E-03 |
| GO:0002821 | positive regulation of adaptive immune response                                                                       | 5/71  | 1.43E-03 |
| GO:0071346 | cellular response to interferon-gamma                                                                                 | 5/71  | 1.43E-03 |
| GO:0001776 | leukocyte homeostasis                                                                                                 | 5/71  | 1.71E-03 |
| GO:0046635 | positive regulation of alpha-beta T cell activation                                                                   | 4/71  | 1.89E-03 |
| GO:0030098 | lymphocyte differentiation                                                                                            | 8/71  | 1.89E-03 |
| GO:0043372 | positive regulation of CD4-positive, alpha-beta T cell differentiation                                                | 3/71  | 2.52E-03 |
| GO:0032611 | interleukin-1 beta production                                                                                         | 4/71  | 2.52E-03 |
| GO:0032652 | regulation of interleukin-1 production                                                                                | 4/71  | 2.83E-03 |
| GO:0030888 | regulation of B cell proliferation                                                                                    | 4/71  | 2.98E-03 |
| GO:0050864 | regulation of B cell activation                                                                                       | 5/71  | 3.02E-03 |
| GO:0032675 | regulation of interleukin-6 production                                                                                | 5/71  | 3.07E-03 |
| GO:0042098 | T cell proliferation                                                                                                  | 6/71  | 3.12E-03 |
| GO:0042116 | macrophage activation                                                                                                 | 4/71  | 3.49E-03 |
| GO:0032635 | interleukin-6 production                                                                                              | 5/71  | 3.58E-03 |
| GO:0050671 | positive regulation of lymphocyte proliferation                                                                       | 5/71  | 3.58E-03 |
| GO:2000516 | positive regulation of CD4-positive, alpha-beta T cell activation                                                     | 3/71  | 3.58E-03 |
| GO:0032946 | positive regulation of mononuclear cell proliferation                                                                 | 5/71  | 3.80E-03 |
| GO:0002687 | positive regulation of leukocyte migration                                                                            | 5/71  | 4.14E-03 |
| GO:0070665 | positive regulation of leukocyte proliferation                                                                        | 5/71  | 4.24E-03 |
| GO:0050670 | regulation of lymphocyte proliferation                                                                                | 6/71  | 4.26E-03 |
| GO:0002443 | leukocyte mediated immunity                                                                                           | 7/71  | 4.39E-03 |
| GO:0032944 | regulation of mononuclear cell proliferation                                                                          | 6/71  | 4.39E-03 |

---

**Table S2. List of the top 10 significantly enriched immune-related GO terms (combination vs. control groups and combination vs.  $\alpha$ PD-L1 groups).**

| Combination vs Control |                                                                        |           |          |
|------------------------|------------------------------------------------------------------------|-----------|----------|
| GOID                   | Description                                                            | GeneRatio | padj     |
| GO:0050778             | positive regulation of immune response                                 | 66/683    | 2.40E-14 |
| GO:0001819             | positive regulation of cytokine production                             | 56/683    | 9.28E-14 |
| GO:0034341             | response to interferon-gamma                                           | 31/683    | 1.03E-13 |
| GO:0002474             | antigen processing and presentation of peptide antigen via MHC class I | 18/683    | 3.83E-13 |
| GO:0002697             | regulation of immune effector process                                  | 50/683    | 7.04E-13 |
| GO:0097530             | granulocyte migration                                                  | 29/683    | 1.49E-12 |
| GO:0060326             | cell chemotaxis                                                        | 41/683    | 4.60E-12 |
| GO:0031349             | positive regulation of defense response                                | 45/683    | 5.97E-12 |
| GO:0030593             | neutrophil chemotaxis                                                  | 23/683    | 1.33E-11 |
| GO:0030595             | leukocyte chemotaxis                                                   | 34/683    | 3.30E-11 |

  

| Combination vs $\alpha$ PD-L1 |                                                                        |           |             |
|-------------------------------|------------------------------------------------------------------------|-----------|-------------|
| GOID                          | Description                                                            | GeneRatio | padj        |
| GO:0035456                    | response to interferon-beta                                            | 13/172    | 4.48203E-12 |
| GO:0098542                    | defense response to other organism                                     | 22/172    | 7.37877E-08 |
| GO:0034341                    | response to interferon-gamma                                           | 13/172    | 2.42527E-07 |
| GO:0002474                    | antigen processing and presentation of peptide antigen via MHC class I | 8/172     | 7.17085E-07 |
| GO:0052547                    | regulation of peptidase activity                                       | 18/172    | 4.70726E-06 |
| GO:0019221                    | cytokine-mediated signaling pathway                                    | 17/172    | 1.28654E-05 |
| GO:0070098                    | chemokine-mediated signaling pathway                                   | 7/172     | 5.23749E-05 |
| GO:0006959                    | humoral immune response                                                | 10/172    | 6.3301E-05  |
| GO:0002697                    | regulation of immune effector process                                  | 15/172    | 0.000207045 |
| GO:0002449                    | lymphocyte mediated immunity                                           | 12/172    | 0.000323608 |

**Table S3. List of enriched signature genes of the IFN- $\gamma$  response heat map.**

| gene_name  | Control_Mean | Nintedanib_Mean | PD_L1_Mean   | Combination_Mean |
|------------|--------------|-----------------|--------------|------------------|
| C1ra       | -0.902484374 | -0.086503448    | -0.441187059 | 1.451800744      |
| Zbp1       | -1.042175738 | 0.189987078     | -0.328361954 | 1.133053845      |
| Apol6      | -0.760255649 | -0.31399258     | -0.328302905 | 1.481049279      |
| AC168977.1 | -0.405240103 | -0.01012377     | -0.787854563 | 1.205749378      |
| AC133103.1 | -1.047997003 | 0.510245622     | -0.571098436 | 0.98128841       |
| Apol9a     | -0.306893593 | -0.042330034    | -0.73804231  | 1.097848445      |
| H2-T22     | -0.805996553 | -0.065049204    | -0.428396582 | 1.315704641      |
| H2-T23     | -0.635567103 | -0.288505978    | -0.375467674 | 1.37166725       |
| Psmb9      | -0.694521069 | -0.062797968    | -0.497838087 | 1.270856615      |
| Tap1       | -0.500941282 | -0.393740957    | -0.416591586 | 1.409709064      |
| Bst2       | -0.52444032  | -0.138235268    | -0.448201788 | 1.145436193      |
| Mx2        | -0.318862773 | 0.014705432     | -0.667264422 | 0.967745405      |
| Ccl8       | -0.81956612  | -0.471716384    | -0.052700638 | 1.461912238      |
| Ccl2       | -0.491391404 | -0.117103794    | -0.514556232 | 1.152327378      |
| Xaf1       | -0.959271674 | 0.106584953     | -0.223832577 | 1.04987306       |
| Ifi2712a   | -0.452940402 | 0.139426252     | -0.723056307 | 1.001713895      |
| Ifitm3     | -0.689908139 | 0.044190217     | -0.585159994 | 1.219830361      |
| Cdkn1a     | -0.451283155 | -0.20494524     | -0.549673281 | 1.257137986      |
| Dhx58      | -0.576927393 | 0.03833996      | -0.45553854  | 0.984540983      |
| Tapbp      | -0.698443354 | -0.302464361    | -0.324042215 | 1.40056602       |
| H2-D1      | -0.032926903 | -0.262649115    | -0.798000545 | 1.159238842      |
| Gbp11      | -0.80793338  | -0.046461937    | -0.420351994 | 1.286362795      |
| Cfh        | -1.191067322 | 0.265256324     | -0.290231936 | 1.149728853      |
| H2-K1      | -0.306240348 | -0.082280167    | -0.781018273 | 1.190108829      |
| Ccl12      | -1.004903932 | 0.593960706     | -0.389480243 | 0.651933293      |
| Gbp3       | -0.897573836 | -0.214434958    | -0.033629546 | 1.19924708       |
| Ifi35      | -0.42385418  | 0.065662429     | -0.663202973 | 1.004979116      |
| Ogfr       | 0.088939037  | -0.219740817    | -0.837073572 | 1.022810556      |
| Gbp9       | -0.926091793 | 0.000819809     | -0.104334071 | 1.029401103      |
| H2-T24     | -0.9473801   | -0.099098134    | -0.114979913 | 1.186232681      |
| Stat1      | -1.107023769 | 0.188679835     | -0.135316764 | 1.006490739      |
| Samhd1     | -1.041329439 | -0.097062386    | -0.100501722 | 1.263159143      |
| Rtp4       | -0.589390419 | 0.024474716     | -0.392258377 | 0.951055401      |
| Psmb10     | -0.643543641 | -0.18265173     | -0.362240097 | 1.2340984        |
| Ifit3      | -0.537485241 | 0.074123434     | -0.562458306 | 1.007289254      |
| Herc6      | -0.870001715 | 0.099843885     | -0.226363464 | 0.971560322      |
| Stat2      | -0.823608594 | 0.032630688     | -0.215853625 | 0.998673859      |
| Gbp8       | -1.25546677  | 0.005157417     | 0.226652366  | 1.022367632      |
| Nod1       | -0.989945904 | -0.054903432    | -0.142309285 | 1.200884479      |
| Psme2      | -0.641474752 | -0.236138307    | -0.279782581 | 1.216430218      |
| H2-Q7      | -0.559592029 | -0.753687894    | 0.456017339  | 1.045684557      |



|          |              |              |              |             |
|----------|--------------|--------------|--------------|-------------|
| Ccl11    | -0.829963781 | -0.011522506 | -0.252487156 | 1.096854069 |
| Il18bp   | -1.137472106 | -0.339751393 | 0.574272463  | 0.987888885 |
| Sod2     | -0.843019945 | -0.326736798 | -0.051083869 | 1.302524811 |
| Slamf7   | -1.053341913 | -0.180599787 | 0.280661628  | 0.998430019 |
| Lgals3bp | -0.736759135 | -0.430531701 | 0.052596575  | 1.222327187 |
| Nlrc5    | -0.919999271 | -0.177793491 | -0.048416324 | 1.190657458 |
| Itgb2    | -0.810288352 | -0.528287513 | 0.76441746   | 0.706230282 |
| Batf2    | -0.977194773 | -0.342485077 | 0.187607824  | 1.217693296 |
| Gbp5     | -1.100775107 | -0.032995756 | 0.013625098  | 1.128394704 |
| Trafd1   | -0.680145373 | -0.40812266  | -0.067096329 | 1.257395027 |
| Znfx1    | -1.148558655 | 0.249802431  | -0.167138931 | 1.003444548 |
| Stat3    | -1.017802309 | 0.431823266  | -0.457834987 | 0.935858213 |
| Ly6e     | -1.179933537 | 0.14963086   | 0.06782009   | 0.925074872 |
| Mt2      | -0.82771492  | 0.648976951  | -0.536745258 | 0.553238989 |
| Ptgs2    | -0.812524328 | -0.160797334 | 0.864648784  | 0.148872211 |
| Casp4    | -0.544367518 | -0.468247582 | 0.105273918  | 1.024403078 |
| Gbp2     | -1.042685679 | -0.16252294  | 0.080070668  | 1.165768686 |
| Fpr2     | -0.531009757 | -0.713208841 | 0.688276092  | 0.734244716 |
| Mvp      | -0.245397646 | -0.122212959 | -0.679296292 | 1.077460137 |
| Ifih1    | -0.887938313 | 0.065625833  | -0.152881997 | 0.958788019 |
| Il15ra   | -0.817781737 | -0.399450883 | 0.18982599   | 1.127269351 |
| Wars     | -0.55759426  | -0.657983817 | 0.148776031  | 1.231298    |
| Irf2     | -1.063015862 | 0.288974934  | -0.061422152 | 0.763219346 |
| Cd274    | -0.849170617 | -0.46720303  | 0.336602249  | 1.096572156 |
| Psmb8    | 0.045019486  | -0.38346523  | -0.500876285 | 0.935188336 |
| Sp110    | -1.168761809 | 0.20095753   | -0.047340255 | 0.964905152 |
| Ccl5     | -0.95582644  | -0.537507157 | 0.736113943  | 0.891596443 |
| Gch1     | -1.019353503 | -0.18236899  | 0.281681113  | 0.965633628 |
| Il4ra    | -0.652316204 | -0.676160993 | 0.57784911   | 0.919668335 |
| H2-Q6    | -0.554133319 | -0.725416854 | 0.472033895  | 0.988870492 |
| B2m      | -1.1003868   | 0.382371841  | -0.061227769 | 0.683649768 |
| Cd38     | -0.71885682  | -0.539736599 | 0.767827758  | 0.625699811 |
| Parp12   | -0.582770449 | -0.292120038 | -0.29747235  | 1.245392846 |
| Tnfaip3  | -1.234336393 | 0.200278633  | 0.26258402   | 0.721404082 |
| Ddx58    | -1.045182834 | 0.240009777  | 0.002375255  | 0.742795358 |
| Gbp4     | -1.02615171  | -0.101011517 | 0.211743972  | 0.940672133 |
| Ccl7     | -1.280786689 | 0.3994843    | -0.020724617 | 0.802155931 |
| Cflar    | -1.104504259 | 0.308567474  | 0.11010531   | 0.608689607 |
| Il15     | -0.885133864 | 0.10261008   | -0.268205946 | 1.025077211 |
| Ube2l6   | -1.00505253  | 0.210896321  | -0.174042214 | 0.915474342 |
| Trim21   | -0.783785034 | -0.028390242 | -0.265696203 | 1.084969041 |
| Casp12   | -0.877666035 | 0.535691836  | -0.405244591 | 0.613295831 |
| Rnf31    | -0.897979646 | -0.326500126 | 0.282982387  | 1.023122416 |
| Helz2    | -0.510587799 | -0.186172097 | -0.320205027 | 1.063507946 |

|            |              |              |              |             |
|------------|--------------|--------------|--------------|-------------|
| Rnf213     | -0.866596406 | -0.0952769   | -0.11360123  | 1.09929376  |
| Vcam1      | -1.059943002 | 0.504107883  | -0.211666572 | 0.64147472  |
| Fpr1       | -0.506098992 | -0.83422796  | 0.831607276  | 0.717276665 |
| Mt1        | -0.751117575 | 1.014246387  | -0.821140181 | 0.304449772 |
| Ifi27      | -0.345001111 | 0.150762713  | -0.726948059 | 0.883495779 |
| Tnfsf10    | -0.892841208 | -0.548253951 | 0.911408639  | 0.666750008 |
| Parp14     | -0.909221225 | -0.071850105 | 0.027399207  | 0.971634649 |
| Epsti1     | -0.829104417 | -0.342766027 | 0.569959347  | 0.687602604 |
| Fcgr1      | -0.695981773 | -0.637189516 | 0.899878555  | 0.592590113 |
| Lysmd2     | -1.06968529  | -0.058264309 | -0.051583547 | 1.194099223 |
| H2-Q4      | -0.110443212 | -0.250999664 | -0.614411156 | 1.038603948 |
| Gbp7       | -0.917554308 | -0.007519144 | 0.033740461  | 0.893212776 |
| Sppl2a     | -1.067912498 | 0.59360038   | -0.107070391 | 0.432982414 |
| H2-Q10     | -0.589064828 | -0.331240613 | 0.126925124  | 0.87619047  |
| Mean Score | -0.77956137  | -0.088494967 | -0.11762681  | 1.007806889 |

**Table S4. List of enriched signature genes of the IFN- $\alpha$  response heat map.**

| gene_name  | Control_Mean | Nintedanib_Mean | PD_L1_Mean   | Combination_Mean |
|------------|--------------|-----------------|--------------|------------------|
| AC168977.1 | -0.405240103 | -0.01012377     | -0.787854563 | 1.205749378      |
| AC133103.1 | -1.047997003 | 0.510245622     | -0.571098436 | 0.98128841       |
| H2-T22     | -0.805996553 | -0.065049204    | -0.428396582 | 1.315704641      |
| H2-T23     | -0.635567103 | -0.288505978    | -0.375467674 | 1.37166725       |
| Psmb9      | -0.694521069 | -0.062797968    | -0.497838087 | 1.270856615      |
| Tap1       | -0.500941282 | -0.393740957    | -0.416591586 | 1.409709064      |
| Bst2       | -0.52444032  | -0.138235268    | -0.448201788 | 1.145436193      |
| Mx2        | -0.318862773 | 0.014705432     | -0.667264422 | 0.967745405      |
| Oas1b      | -0.596328242 | -0.090597251    | -0.387803402 | 1.097378207      |
| Ifi2712a   | -0.452940402 | 0.139426252     | -0.723056307 | 1.001713895      |
| Ifitm3     | -0.689908139 | 0.044190217     | -0.585159994 | 1.219830361      |
| Dhx58      | -0.576927393 | 0.03833996      | -0.45553854  | 0.984540983      |
| H2-D1      | -0.032926903 | -0.262649115    | -0.798000545 | 1.159238842      |
| Gbp11      | -0.80793338  | -0.046461937    | -0.420351994 | 1.286362795      |
| H2-K1      | -0.306240348 | -0.082280167    | -0.781018273 | 1.190108829      |
| Gbp3       | -0.897573836 | -0.214434958    | -0.033629546 | 1.19924708       |
| Ifi35      | -0.42385418  | 0.065662429     | -0.663202973 | 1.004979116      |
| Ogfr       | 0.088939037  | -0.219740817    | -0.837073572 | 1.022810556      |
| Gbp9       | -0.926091793 | 0.000819809     | -0.104334071 | 1.029401103      |
| H2-T24     | -0.9473801   | -0.099098134    | -0.114979913 | 1.186232681      |
| Rtp4       | -0.589390419 | 0.024474716     | -0.392258377 | 0.951055401      |
| Trim30d    | -1.04588107  | 0.247105613     | -0.239723888 | 0.976722941      |
| Trim12a    | -0.649825985 | -0.100642789    | -0.372757142 | 1.148386613      |
| Ifit3      | -0.537485241 | 0.074123434     | -0.562458306 | 1.007289254      |
| Herc6      | -0.870001715 | 0.099843885     | -0.226363464 | 0.971560322      |
| Stat2      | -0.823608594 | 0.032630688     | -0.215853625 | 0.998673859      |
| Gbp8       | -1.25546677  | 0.005157417     | 0.226652366  | 1.022367632      |
| Psme2      | -0.641474752 | -0.236138307    | -0.279782581 | 1.216430218      |
| H2-Q7      | -0.559592029 | -0.753687894    | 0.456017339  | 1.045684557      |
| Lgals3bp   | -0.736759135 | -0.430531701    | 0.052596575  | 1.222327187      |
| Uba7       | -0.629220061 | -0.383565663    | -0.115785126 | 1.224462266      |
| Batf2      | -0.977194773 | -0.342485077    | 0.187607824  | 1.217693296      |
| Gbp5       | -1.100775107 | -0.032995756    | 0.013625098  | 1.128394704      |
| Trafd1     | -0.680145373 | -0.40812266     | -0.067096329 | 1.257395027      |
| Csfl       | -1.215287351 | 0.20269669      | -0.025781295 | 0.987697784      |
| Ly6e       | -1.179933537 | 0.14963086      | 0.06782009   | 0.925074872      |
| Sell       | -0.912308784 | -0.190795239    | 0.650615689  | 0.500187144      |
| Gbp2       | -1.042685679 | -0.16252294     | 0.080070668  | 1.165768686      |
| Ifih1      | -0.887938313 | 0.065625833     | -0.152881997 | 0.958788019      |
| Wars       | -0.55759426  | -0.657983817    | 0.148776031  | 1.231298         |
| Irf2       | -1.063015862 | 0.288974934     | -0.061422152 | 0.763219346      |

|            |              |              |              |             |
|------------|--------------|--------------|--------------|-------------|
| Psmb8      | 0.045019486  | -0.38346523  | -0.500876285 | 0.935188336 |
| Sp110      | -1.168761809 | 0.20095753   | -0.047340255 | 0.964905152 |
| Trim5      | -0.944913823 | 0.077247175  | -0.102313299 | 0.950668153 |
| Il4ra      | -0.652316204 | -0.676160993 | 0.57784911   | 0.919668335 |
| H2-Q6      | -0.554133319 | -0.725416854 | 0.472033895  | 0.988870492 |
| Trim12c    | -0.852267387 | 0.095568272  | -0.190979417 | 0.923786463 |
| B2m        | -1.1003868   | 0.382371841  | -0.061227769 | 0.683649768 |
| Parp12     | -0.582770449 | -0.292120038 | -0.29747235  | 1.245392846 |
| Gbp4       | -1.02615171  | -0.101011517 | 0.211743972  | 0.940672133 |
| Cflar      | -1.104504259 | 0.308567474  | 0.11010531   | 0.608689607 |
| Il15       | -0.885133864 | 0.10261008   | -0.268205946 | 1.025077211 |
| Ube2l6     | -1.00505253  | 0.210896321  | -0.174042214 | 0.915474342 |
| Trim21     | -0.783785034 | -0.028390242 | -0.265696203 | 1.084969041 |
| Rnf31      | -0.897979646 | -0.326500126 | 0.282982387  | 1.023122416 |
| Trim30a    | -1.010472585 | 0.119046087  | 0.020611346  | 0.84105363  |
| Helz2      | -0.510587799 | -0.186172097 | -0.320205027 | 1.063507946 |
| Ifi27      | -0.345001111 | 0.150762713  | -0.726948059 | 0.883495779 |
| Parp14     | -0.909221225 | -0.071850105 | 0.027399207  | 0.971634649 |
| Epsti1     | -0.829104417 | -0.342766027 | 0.569959347  | 0.687602604 |
| H2-Q4      | -0.110443212 | -0.250999664 | -0.614411156 | 1.038603948 |
| Gbp7       | -0.917554308 | -0.007519144 | 0.033740461  | 0.893212776 |
| H2-Q10     | -0.589064828 | -0.331240613 | 0.126925124  | 0.87619047  |
| Mean Score | -0.733220691 | -0.091192361 | -0.19145417  | 1.038665312 |
